# Supplementary material
Source: PubMed Central journal article supplement (PMC6737523)
Supplement: jama-322-936-s001.pdf [file jama-322-936-s001.pdf]

## Supplementary Online Content

Rathinam SR, Gonzales JA, Thundikandy R, et al. Effect of corticosteroid-sparing treatment with mycophenolate mofetil vs methotrexate on inflammation in patients with uveitis: a randomized clinical trial. *JAMA*. doi:10.1001/jama.2019.12618

**eBox.** All Eligibility Criteria for Enrollment in the FAST Uveitis Randomized Clinical Trial

**eTable 1.** Definitions of Serious and Nonserious Adverse Events

**eTable 2.** Enrollment Totals by Center

**eTable 3.** Dose Reduction Guidelines for Study Medication

**eTable 4.** Six-Month Patient-Reported Other Ocular Adverse Events

**eTable 5.** Six-Month Patient-Reported Mood-Related Adverse Events

**eTable 6.** Six-Month Patient-Reported Other Systemic Adverse Events

**eTable 7.** Tests of Homogeneity of Effect for the 6-Month Primary Outcome

**eTable 8.** Six- to 12-Month Adverse Events from a RCT Comparing Methotrexate and Mycophenolate Mofetil for Noninfectious Uveitis in Patients Continuing on Treatment after Treatment Success

**eTable 9.** Six- to 12-Month Adverse Events from a RCT Comparing Methotrexate and Mycophenolate Mofetil for Noninfectious Uveitis in Patients Switching to the Other Antimetabolite

This supplementary material has been provided by the authors to give readers additional information about their work.

## Supplement 3 Appendix

### Table of Contents

|                                                                                                                                                                                                  |    |
|--------------------------------------------------------------------------------------------------------------------------------------------------------------------------------------------------|----|
| Title Page and Table of Contents.....                                                                                                                                                            | 1  |
| eBox. All Eligibility Criteria for Enrollment in the FAST Uveitis Randomized Clinical Trial.....                                                                                                 | 2  |
| eTable 1: Definitions of Serious and Non-serious Adverse Events.....                                                                                                                             | 4  |
| eTable 2: Enrollment Totals by Center.....                                                                                                                                                       | 7  |
| eTable 3: Dose Reduction Guidelines for Study Medication.....                                                                                                                                    | 8  |
| eTable 4: Six-Month Patient-Reported Other Ocular Adverse Events<br>.....                                                                                                                        | 9  |
| eTable 5: Six-Month Patient-Reported Mood-Related Adverse Events<br>.....                                                                                                                        | 10 |
| eTable 6: Six-Month Patient-Reported Other Systemic Adverse Events<br>.....                                                                                                                      | 11 |
| eTable 7: Tests of Homogeneity of Effect for the 6-Month Primary Outcome .....                                                                                                                   | 12 |
| eTable 8: Six- to 12-Month Adverse Events from a RCT Comparing Methotrexate and Mycophenolate Mofetil for Noninfectious Uveitis in Patients Continuing on Treatment after Treatment Success..... | 13 |
| eTable 9: Six- to 12-Month Adverse Events from a RCT Comparing Methotrexate and Mycophenolate Mofetil for Noninfectious Uveitis in Patients Switching Treatment to Other Antimetabolite.....     | 14 |

## eBox. All Eligibility Criteria for Enrollment in the FAST Uveitis Randomized Clinical Trial

| Inclusion Criteria (All must be met)                                                                                                                                                                                                                                                                                                                                                                                                                                                                                                                                                                                                                                                                                                                                                                                                                                                                                                                                                                                                                                                                                                                                                                                                                                                                                                                                                                                                                                                                                                                                                                                                                                                                                                                                                                                                                                                                                                                                                                                                                                                                                                                                                                                                                                                                                                                                                                                                                                                                                                                                                                                                                                                                                                                                                                                                                                                                                                                                                                                                                                                             |
|--------------------------------------------------------------------------------------------------------------------------------------------------------------------------------------------------------------------------------------------------------------------------------------------------------------------------------------------------------------------------------------------------------------------------------------------------------------------------------------------------------------------------------------------------------------------------------------------------------------------------------------------------------------------------------------------------------------------------------------------------------------------------------------------------------------------------------------------------------------------------------------------------------------------------------------------------------------------------------------------------------------------------------------------------------------------------------------------------------------------------------------------------------------------------------------------------------------------------------------------------------------------------------------------------------------------------------------------------------------------------------------------------------------------------------------------------------------------------------------------------------------------------------------------------------------------------------------------------------------------------------------------------------------------------------------------------------------------------------------------------------------------------------------------------------------------------------------------------------------------------------------------------------------------------------------------------------------------------------------------------------------------------------------------------------------------------------------------------------------------------------------------------------------------------------------------------------------------------------------------------------------------------------------------------------------------------------------------------------------------------------------------------------------------------------------------------------------------------------------------------------------------------------------------------------------------------------------------------------------------------------------------------------------------------------------------------------------------------------------------------------------------------------------------------------------------------------------------------------------------------------------------------------------------------------------------------------------------------------------------------------------------------------------------------------------------------------------------------|
| <ul style="list-style-type: none"><li>• 16 years of age or older</li><li>• History of noninfectious intermediate, anterior and intermediate, posterior or panuveitis in at least one eye</li><li>• Active inflammation within the last 180 days, defined by the presence of <b>any of the following</b> (in at least one eye) according to SUN criteria and the NEI vitreous haze grading scale:<ul style="list-style-type: none"><li>≥ 2+ anterior chamber cells and/or</li><li>≥ 2+ vitreous haze and/or</li><li>active retinal or choroidal inflammation</li></ul></li><li>• Active inflammation in at least one eye at enrollment, defined by <b>any of the following</b>:<ul style="list-style-type: none"><li>≥ 1+ anterior chamber cells and/or</li><li>≥ 1+ vitreous haze and/or</li><li>active retinal/choroidal inflammation (bullous serous retinal detachment qualifies if choroidal thickening)</li></ul></li><li>• <b>At least one</b> of the following criteria must be met before or at enrollment:<ol style="list-style-type: none"><li>1.) Active inflammation after 4 weeks of high-dose (1mg/kg prednisone equivalent) oral corticosteroid treatment</li><li>2.) Treatment with oral corticosteroids resulting in a reduction of inflammation, followed by an increase in inflammation (of at least 1 grade in anterior chamber cells or vitreous haze or a change of non-active to active retinal/choroidal lesions) when corticosteroid is tapered, in the 180 days prior to enrollment</li><li>3.) Treatment with ≥10mg/day oral prednisone or equivalent over at least the past 90 days prior to enrollment</li><li>4.) Active inflammation after long-acting corticosteroid injection 4 weeks to 180 days prior to enrollment</li><li>5.) One of the following uveitic conditions necessitating corticosteroid-sparing immunosuppressive treatment<sup>4</sup>:<ul style="list-style-type: none"><li>▪ Behcet's disease with posterior segment involvement</li><li>▪ Multifocal choroiditis with panuveitis</li><li>▪ Serpiginous choroidopathy</li><li>▪ Birdshot retinochoroidopathy</li><li>▪ Diffuse retinal vasculitis</li><li>▪ Severe Vogt-Koyanagi-Harada syndrome (VKH) (for example: acute VKH that has been active for at least 4 weeks, or VKH with bullous serous retinal detachments and/or choroidal detachments with other signs of ocular inflammation)</li><li>▪ Sympathetic ophthalmia</li></ul></li><li>6.) Other conditions necessitating corticosteroid-sparing immunosuppressive therapy determined on a case-by-case basis.</li></ol></li><li>• Willingness to start corticosteroid treatment at 1mg/kg or 60mg a day of prednisone, whichever is less (starting at a lower dose is acceptable if patient has known tolerability issues)</li><li>• Willingness to limit alcohol consumption (American College of Rheumatology recommendation is 2 drinks per month or less)</li><li>• Willingness to use an acceptable method of contraception during the study period (i.e. pharmacologics, devices, barrier methods) or abstinence.</li></ul> |
| Exclusion Criteria (Any one excludes patient)                                                                                                                                                                                                                                                                                                                                                                                                                                                                                                                                                                                                                                                                                                                                                                                                                                                                                                                                                                                                                                                                                                                                                                                                                                                                                                                                                                                                                                                                                                                                                                                                                                                                                                                                                                                                                                                                                                                                                                                                                                                                                                                                                                                                                                                                                                                                                                                                                                                                                                                                                                                                                                                                                                                                                                                                                                                                                                                                                                                                                                                    |

- Any infectious cause of uveitis
- Prior immunosuppressive therapy other than corticosteroids in the past 12 months
- Prior intolerance or safety issues with methotrexate or mycophenolate mofetil
- Prior failure to control ocular or other inflammation using methotrexate or mycophenolate mofetil
- Prior biologic therapy at any time
- < 16 years of age at enrollment
- Media opacity (such as cataract and/or corneal scar) and/or extensive posterior synechiae such that examination of the posterior segment is not possible in both eyes
- Chronic hypotony (IOP < 5 mm Hg for > 3 months) in both eyes
- Periocular or intravitreal corticosteroid injection in the past 4 weeks
- Fluocinolone acetonide implant in either eye in < 3 years
- Intraocular surgery in < 30 days, or planned surgery within the next 180 days
- Best spectacle-corrected visual acuity of hand motion or worse in better eye
- Planning to conceive during the study period, pregnant or breast-feeding (blood or urine pregnancy test for all females, excluding those who are post-menopausal is mandatory within 4 weeks prior to enrollment)
- History of cancer (If a patient has a history of non-melanoma skin cancer they can still be considered for inclusion in this study, provided it is not currently active).
- Systemic autoimmune disease or ocular condition (besides uveitis) anticipated to dictate treatment course
- Abnormal CBC ( $\leq$  2,500 white blood cells and/or  $\leq$  75,000 platelets and/or  $\leq$  9 hemoglobin) within 4 weeks prior to enrollment\*
- Abnormal alanine aminotransferase (ALT) and/or aspartate aminotransferase (AST)  $\geq$  2 times the upper limit of normal for the lab and/or creatinine  $\geq$  1.5 within 4 weeks prior to enrollment
- Evidence of active tuberculosis, HIV infection, syphilis, or hepatitis B or C (patients must have a tuberculin skin test, or interferon-gamma release assay, a chest radiograph, RPR/VDRL, FTA-ABS, or other treponemal tests, Hepatitis B surface antigen and Hepatitis C antibody tests within 90 days prior to enrollment)

**eTable 1. Definitions of Serious and Nonserious Adverse Events**

|                                       | <b>Non-Serious</b>                                                                                                                                    | <b>Serious</b>                                                                                                                                                                                                         |
|---------------------------------------|-------------------------------------------------------------------------------------------------------------------------------------------------------|------------------------------------------------------------------------------------------------------------------------------------------------------------------------------------------------------------------------|
| <b>Ocular Adverse Events</b>          |                                                                                                                                                       |                                                                                                                                                                                                                        |
| Ocular Hypertension                   | ≥ 24 mm Hg                                                                                                                                            | Surgery required (laser or incisional)                                                                                                                                                                                 |
| Glaucoma                              | Suspect or confirmed diagnosis of glaucomatous optic nerve damage                                                                                     | Confirmed diagnosis with > 3 lines of vision loss or decrease in mean deviation (MD) by 10 dB or more                                                                                                                  |
| Hypotony                              | IOP < 5 mm Hg without retinal or choroidal folds, elevation of optic nerve head, suprachoroidal effusions or hemorrhage, or corneal striae associated | IOP < 5 mm Hg with structural changes or ocular changes indicative of hypotony such as retinal or choroidal folds, elevation of optic nerve head, suprachoroidal effusions or hemorrhage, or corneal striae associated |
| Cataract                              | Visually significant cataract / cataract surgery indicated                                                                                            | Not applicable (n/a)                                                                                                                                                                                                   |
| Vitreous hemorrhage                   | Peripheral and/or central vitreous hemorrhage                                                                                                         | n/a                                                                                                                                                                                                                    |
| Endophthalmitis                       | n/a                                                                                                                                                   | Any occurrence is a serious adverse event                                                                                                                                                                              |
| Retinal detachment (excluding serous) | n/a                                                                                                                                                   | Any occurrence is a serious adverse event                                                                                                                                                                              |
| Other ocular event                    | Describe                                                                                                                                              | Condition resulting in permanent vision loss. Describe.                                                                                                                                                                |
| <b>Laboratory Abnormalities</b>       |                                                                                                                                                       |                                                                                                                                                                                                                        |
| Leukocytes                            | >1,000 and <2,500/ $\mu$ L lasting less than 28 days                                                                                                  | < 2,500/ $\mu$ L for at least 28 days or $\leq$ 1,000/ $\mu$ L                                                                                                                                                         |
| Platelets                             | 20,000 to 75,000/ $\mu$ L lasting less than 28 days                                                                                                   | <75,000/ $\mu$ L for at least 28 days or < 20,000/ $\mu$ L                                                                                                                                                             |
| Hemoglobin                            | ≥ 6.5 to < 9 g/dL lasting less than 28 days                                                                                                           | < 9 g/dL for at least 28 days or < 6.5 g/dL                                                                                                                                                                            |
| SGOT (AST) or SGPT (ALT)              | 2 to 5 times the upper limit of normal lasting less than 28 days                                                                                      | 2 to 5 times the upper limit of normal for at least 28 days or > 5 times the upper limit of normal                                                                                                                     |
| Creatinine                            | ≥ 1.5 to < 2 mg/dL lasting less than 28 days                                                                                                          | ≥ 1.5 to < 2 mg/dL for at least 28 days or ≥ 2 mg/dL                                                                                                                                                                   |
| <b>Systemic Adverse Events</b>        |                                                                                                                                                       |                                                                                                                                                                                                                        |
| Nausea                                | Any nausea                                                                                                                                            | Severe discomfort, minimal food intake for 3 or more days <b>or</b> at least a 2.5 kg weight loss resulting from nausea                                                                                                |
| Vomiting                              | Any vomiting                                                                                                                                          | Vomiting all food or fluids in 24 hours or orthostatic hypotension or at least a 2.5 kg weight loss resulting from vomiting                                                                                            |

|                                 | <b>Non-Serious</b>                                                                                                                                | <b>Serious</b>                                                                                                                                                                                                                                        |
|---------------------------------|---------------------------------------------------------------------------------------------------------------------------------------------------|-------------------------------------------------------------------------------------------------------------------------------------------------------------------------------------------------------------------------------------------------------|
| Diarrhea                        | Any diarrhea                                                                                                                                      | Severe, bloody diarrhea or 8-9 loose stools in 24 hours or orthostatic hypotension <b>or</b> at least a 2.5 kg weight loss resulting from diarrhea                                                                                                    |
| Dyspnea                         | Breathlessness on significant exertion <b>or</b> breathlessness at normal level of activity                                                       | Breathlessness at rest                                                                                                                                                                                                                                |
| Headache                        | Moderate, non-narcotic analgesic therapy required                                                                                                 | Severe, requires narcotic therapy                                                                                                                                                                                                                     |
| Fatigue                         | Self-reported fatigue                                                                                                                             | Normal activity reduced >50%; cannot work or unable to care for self                                                                                                                                                                                  |
| Fever for 12 hours              | > 100.6 to 103°F/39.5°C                                                                                                                           | ≥ 103°F/39.5°C                                                                                                                                                                                                                                        |
| Muscle weakness                 | Subjective weakness, no objective symptoms <b>or</b> mild objective weakness, no decrease in function                                             | Objective weakness, function limited, or worse                                                                                                                                                                                                        |
| Mood changes                    | Self-reported mood changes or psychiatric diagnosis not requiring medical therapy                                                                 | Psychiatric diagnosis requiring medical treatment or hospitalization                                                                                                                                                                                  |
| Cardiac function                | Mild congestive heart failure (CHF) or arrhythmia not requiring treatment or moderate CHF or worse, arrhythmia requiring treatment, stable angina | Unstable angina, severe CHF, myocardial infarction, or arrhythmia requiring hospitalization                                                                                                                                                           |
| Neurologic function             | Numbness or tingling                                                                                                                              | Total loss sensation                                                                                                                                                                                                                                  |
| Allergic reaction               | Pruritis without rash or erythema or localized urticaria, diffuse maculopapular rash, dry desquamation                                            | Generalized urticaria, angioedema or worse, vesiculation, moist desquamation, ulceration up to and including: exfoliative dermatitis; mucous membrane involvement; or Stevens-Johnson Syndrome, or erythema multiforme, or necrosis requiring surgery |
| Systemic infection              | Any systemic infection.                                                                                                                           | Systemic infection requiring hospitalization or any infection lasting for more than 28 days                                                                                                                                                           |
| Other systemic                  | No treatment required and no limitations or mild impairment of usual activities                                                                   | Vigorous treatment, hospitalization usually required, immediate risk of death                                                                                                                                                                         |
| Seizure                         | n/a                                                                                                                                               | Any occurrence is a serious adverse event                                                                                                                                                                                                             |
| Cancer                          | n/a                                                                                                                                               | Any occurrence is a serious adverse event                                                                                                                                                                                                             |
| Congenital Anomaly/Birth Defect | n/a                                                                                                                                               | Any occurrence is a serious adverse event                                                                                                                                                                                                             |
| Disability or Permanent Damage  | n/a                                                                                                                                               | Any occurrence is a serious adverse event                                                                                                                                                                                                             |

|                                                              | <b>Non-Serious</b> | <b>Serious</b>                            |
|--------------------------------------------------------------|--------------------|-------------------------------------------|
| Hospitalization                                              | n/a                | Any occurrence is a serious adverse event |
| Life-threatening event                                       | n/a                | Any occurrence is a serious adverse event |
| Required intervention to prevent permanent impairment/damage | n/a                | Any occurrence is a serious adverse event |
| Death                                                        | n/a                | Any occurrence is a serious adverse event |
| Other serious (important medical events)                     | n/a                | Any occurrence is a serious adverse event |

**eTable 2. Enrollment Totals by Center**

| Center        | Enrolled |
|---------------|----------|
|               | N (%)    |
| Madurai       | 65 (30%) |
| Pondicherry   | 36 (17%) |
| Coimbatore    | 35 (16%) |
| San Francisco | 34 (16%) |
| Melbourne     | 21 (10%) |
| Portland      | 11 (5%)  |
| Riyadh        | 9 (4%)   |
| Mexico City   | 3 (1%)   |
| Chicago       | 2 (1%)   |
| Total         | 216      |

**eTable 3. Dose Reduction Guidelines for Study Medication**

|                           | <b>Drug</b>                      | <b>Day 1</b>          | <b>Day 2</b>              | <b>Day 3</b>              | <b>Day 4</b>              | <b>Day 5</b>              | <b>Day 6</b>              | <b>Day 7</b>              |
|---------------------------|----------------------------------|-----------------------|---------------------------|---------------------------|---------------------------|---------------------------|---------------------------|---------------------------|
| <b>Reduction Level I</b>  | <b>Methotrexate</b>              | <b>10mg<br/>BID</b>   |                           |                           |                           |                           |                           |                           |
|                           | <b>Mycophenolate<br/>mofetil</b> | <b>1g BID</b>         | <b>1g BID</b>             | <b>1g BID</b>             | <b>1g BID</b>             | <b>1g BID</b>             | <b>1g BID</b>             | <b>1g BID</b>             |
| <b>Reduction Level II</b> | <b>Methotrexate</b>              | <b>7.5mg<br/>BID</b>  |                           |                           |                           |                           |                           |                           |
|                           | <b>Mycophenolate<br/>mofetil</b> | <b>500 mg<br/>BID</b> | <b>500<br/>mg<br/>BID</b> | <b>500<br/>mg<br/>BID</b> | <b>500<br/>mg<br/>BID</b> | <b>500<br/>mg<br/>BID</b> | <b>500<br/>mg<br/>BID</b> | <b>500<br/>mg<br/>BID</b> |

**eTable 4. Six-Month Patient-Reported Other Ocular Adverse Events**

| Type                                  | Methotrexate (N=107)                                | Mycophenolate Mofetil (N=108)                                    |
|---------------------------------------|-----------------------------------------------------|------------------------------------------------------------------|
|                                       | Number of Patients Reporting at Least One Event (%) | Number of Patients <sup>a</sup> Reporting at Least One Event (%) |
| Decrease in vision/defective vision   | 9 (8.4)                                             | 19 (17.6)                                                        |
| Eye irritation/burning/itching        | 3 (2.8)                                             | 4 (3.7)                                                          |
| Eye pain                              | 9 (8.4)                                             | 4 (3.7)                                                          |
| Eye floaters                          | 5 (4.7)                                             | 5 (4.7)                                                          |
| Eye redness                           | 5 (4.7)                                             | 4 (3.7)                                                          |
| Eye flashes                           | 3 (2.8)                                             | 2 (1.9)                                                          |
| Eye strain/perceived pressure changes | 5 (4.7)                                             | 2 (1.9)                                                          |
| Photophobia/glare                     | 3 (2.8)                                             | 2 (1.9)                                                          |
| Other ocular issue                    | 7 (6.5)                                             | 4 (3.7)                                                          |
| Any ocular adverse event              | 30 (28.0)                                           | 33 (30.6)                                                        |

<sup>a</sup>Out of 107 patients who received methotrexate and 108 patients who received mycophenolate mofetil (1 patient never received mycophenolate mofetil due to medical contraindication discovered post-randomization)

**eTable 5. Six-Month Patient-Reported Mood-Related Adverse Events**

| Type                                                                                                                                                                                                                          | Methotrexate (N=107)                                | Mycophenolate Mofetil (N=108)                                    |
|-------------------------------------------------------------------------------------------------------------------------------------------------------------------------------------------------------------------------------|-----------------------------------------------------|------------------------------------------------------------------|
|                                                                                                                                                                                                                               | Number of Patients Reporting at Least One Event (%) | Number of Patients <sup>a</sup> Reporting at Least One Event (%) |
| Irritability                                                                                                                                                                                                                  | 1 (0.9)                                             | 1 (0.9)                                                          |
| Anxiety                                                                                                                                                                                                                       | 12 (11.2)                                           | 9 (8.3)                                                          |
| Depression                                                                                                                                                                                                                    | 10 (9.3)                                            | 5 (4.6)                                                          |
| Frustration                                                                                                                                                                                                                   | 5 (4.7)                                             | 5 (4.6)                                                          |
| High energy/giddiness                                                                                                                                                                                                         | 3 (2.8)                                             | 4 (3.7)                                                          |
| Difficulty concentrating/confusion                                                                                                                                                                                            | 5 (4.7)                                             | 4 (3.7)                                                          |
| Apathy                                                                                                                                                                                                                        | 2 (1.9)                                             | 1 (0.9)                                                          |
| Mood variability                                                                                                                                                                                                              | 7 (6.5)                                             | 2 (1.9)                                                          |
| Other mood issue                                                                                                                                                                                                              | 2 (1.9)                                             | 3 (2.8)                                                          |
| Any mood-related adverse event                                                                                                                                                                                                | 22 (20.6)                                           | 19 (17.6)                                                        |
| <sup>a</sup> Out of 107 patients who received methotrexate and 108 patients who received mycophenolate mofetil (1 patient never received mycophenolate mofetil due to medical contraindication discovered post-randomization) |                                                     |                                                                  |

**eTable 6. Six-Month Patient-Reported Other Systemic Adverse Events**

| Type                                                 | Methotrexate (N=107)                                | Mycophenolate Mofetil (N=108)                                    |
|------------------------------------------------------|-----------------------------------------------------|------------------------------------------------------------------|
|                                                      | Number of Patients Reporting at Least One Event (%) | Number of Patients <sup>a</sup> Reporting at Least One Event (%) |
| Muscle aches and pains/joint pain/neck pain/cramping | 14 (13.1)                                           | 16 (14.8)                                                        |
| Swelling/ankle edema/facial puffiness                | 12 (11.2)                                           | 11 (10.2)                                                        |
| Weight gain/appetite change                          | 0 (0.0)                                             | 0 (0.0)                                                          |
| Rash/skin changes/tinea                              | 0 (0.0)                                             | 0 (0.0)                                                          |
| Stomach pain/heart burn/acid reflux                  | 13 (12.1)                                           | 9 (8.3)                                                          |
| Dizziness                                            | 16 (15.0)                                           | 9 (8.3)                                                          |
| Sleep apnea/trouble sleeping/nightmares              | 14 (13.1)                                           | 11 (10.2)                                                        |
| Abdominal bloating                                   | 8 (7.5)                                             | 4 (3.7)                                                          |
| Shaky hands/shaky body/tremors                       | 8 (7.5)                                             | 3 (2.8)                                                          |
| Cold/flu                                             | 6 (5.6)                                             | 2 (1.9)                                                          |
| Temperature changes                                  | 8 (7.5)                                             | 5 (4.6)                                                          |
| Constipation/change in bowel movements               | 16 (15.0)                                           | 17 (15.7)                                                        |
| Heart palpitations                                   | 4 (3.7)                                             | 4 (3.7)                                                          |
| Chest pain                                           | 2 (1.9)                                             | 3 (2.8)                                                          |
| Increased blood sugar                                | 3 (2.8)                                             | 4 (3.7)                                                          |
| Tinnitus                                             | 5 (4.7)                                             | 5 (4.6)                                                          |
| Cold sore/mouth sore                                 | 2 (1.9)                                             | 1 (0.9)                                                          |
| Sinus/chest congestion                               | 4 (3.7)                                             | 2 (1.9)                                                          |
| Chicken pox/zoster                                   | 6 (5.6)                                             | 1 (0.9)                                                          |
| Genital infection/discharge/sores                    | 4 (3.7)                                             | 6 (5.6)                                                          |
| Sore throat/cough                                    | 1 (0.9)                                             | 3 (2.8)                                                          |
| Delayed healing                                      | 4 (3.7)                                             | 0 (0.0)                                                          |
| Numbness/tingling                                    | 13 (12.1)                                           | 11 (10.2)                                                        |
| Frequent urination                                   | 2 (1.9)                                             | 2 (1.9)                                                          |
| Other systemic                                       | 3 (2.8)                                             | 2 (1.9)                                                          |
| Any systemic adverse event                           | 59 (55.1)                                           | 55 (50.9)                                                        |

<sup>a</sup>Out of 107 patients who received methotrexate and 108 patients who received mycophenolate mofetil (1 patient never received mycophenolate mofetil due to medical contraindication discovered post-randomization)

**eTable 7. Tests of Homogeneity of Effect for the 6-Month Primary Outcome**

| Primary Model <sup>a</sup> with Interaction Term                                                                              | <i>P</i> value <sup>b</sup> |
|-------------------------------------------------------------------------------------------------------------------------------|-----------------------------|
| India <sup>c</sup>                                                                                                            | .15                         |
| Site <sup>c</sup>                                                                                                             | .20                         |
| Country <sup>c</sup>                                                                                                          | .45                         |
| <sup>a</sup> 6-month primary outcome logistic regression model with treatment group as a fixed effect and an interaction term |                             |
| <sup>b</sup> <i>P</i> value of the interaction term                                                                           |                             |
| <sup>c</sup> Fixed effect                                                                                                     |                             |

**eTable 8. Six- to 12-Month Adverse Events from a RCT Comparing Methotrexate and Mycophenolate Mofetil for Noninfectious Uveitis in Patients Continuing on Treatment after Treatment Success**

| Type <sup>a</sup>                                                                                             | Methotrexate<br>(N=62)                                    | Mycophenolate Mofetil<br>(N=56)                           |
|---------------------------------------------------------------------------------------------------------------|-----------------------------------------------------------|-----------------------------------------------------------|
|                                                                                                               | Number of Patients<br>Reporting at Least One<br>Event (%) | Number of Patients<br>Reporting at Least One<br>Event (%) |
| <b>Non-Serious Ocular</b>                                                                                     |                                                           |                                                           |
| Visually significant cataract, surgery indicated                                                              | 1 (1.6)                                                   | 3 (5.4)                                                   |
| Suspect/confirmed glaucoma diagnosis                                                                          | 1 (1.6)                                                   | 1 (1.8)                                                   |
| Ocular hypertension >24mm Hg                                                                                  | 3 (4.8)                                                   | 1 (1.8)                                                   |
| Other ocular event                                                                                            | 16 (25.8)                                                 | 16 (28.6)                                                 |
| <b>Serious Ocular</b>                                                                                         |                                                           |                                                           |
| Ocular hypertension >24mm Hg                                                                                  | 1 (1.6)                                                   | 0 (0.0)                                                   |
| <b>Non-Serious Laboratory</b>                                                                                 |                                                           |                                                           |
| SGOT or SGPT (2 to 5 times upper limit of normal <28 days)                                                    | 7 (11.3)                                                  | 0 (0.0)                                                   |
| Low hemoglobin (>6.5 to <9 g/dL lasting <28 days)                                                             | 1 (1.6)                                                   | 1 (1.8)                                                   |
| <b>Serious Laboratory</b>                                                                                     |                                                           |                                                           |
| SGOT or SGPT (>5 times the upper limit of normal or 2 to 5 times upper limit of normal ≥28 days) <sup>b</sup> | 2 (3.2)                                                   | 0 (0.0)                                                   |
| <b>Non-Serious Systemic</b>                                                                                   |                                                           |                                                           |
| Fatigue                                                                                                       | 26 (41.9)                                                 | 21 (37.5)                                                 |
| Headache                                                                                                      | 20 (32.3)                                                 | 13 (23.2)                                                 |
| Mood changes (self-reported, not requiring therapy)                                                           | 13 (21.0)                                                 | 9 (16.1)                                                  |
| Nausea                                                                                                        | 22 (35.5)                                                 | 12 (21.4)                                                 |
| Muscle weakness, no decrease in function                                                                      | 13 (21.0)                                                 | 6 (10.7)                                                  |
| Numbness or tingling                                                                                          | 8 (12.9)                                                  | 3 (5.4)                                                   |
| Diarrhea                                                                                                      | 5 (8.1)                                                   | 9 (16.1)                                                  |
| Dyspnea                                                                                                       | 4 (6.5)                                                   | 4 (7.1)                                                   |
| Vomiting                                                                                                      | 12 (19.4)                                                 | 12 (21.4)                                                 |
| Allergic reaction                                                                                             | 5 (8.1)                                                   | 4 (7.1)                                                   |
| Fever <103 degrees for 12 hours                                                                               | 3 (4.8)                                                   | 3 (5.4)                                                   |
| Systemic infection                                                                                            | 11 (17.7)                                                 | 7 (12.5)                                                  |
| Other systemic (no treatment required)                                                                        | 29 (46.8)                                                 | 23 (41.1)                                                 |
| <b>Serious Systemic</b>                                                                                       |                                                           |                                                           |
| Cancer                                                                                                        | 0 (0.0)                                                   | 1 (1.8)                                                   |
| Muscle weakness, function limited or worse                                                                    | 1 (1.6)                                                   | 0 (0.0)                                                   |
| Nausea                                                                                                        | 1 (1.6)                                                   | 0 (0.0)                                                   |

<sup>a</sup>Criteria for defining serious and non-serious adverse events included in eFigure 2

<sup>b</sup>All drug-related serious adverse events were due to elevated SGOT or SGPT (>5 times the upper limit of normal or 2 to 5 times the upper limit of normal for ≥28 days) and nausea

**eTable 9. Six- to 12-Month Adverse Events from a RCT Comparing Methotrexate and Mycophenolate Mofetil for Noninfectious Uveitis in Patients Switching to the Other Antimetabolite**

| Type <sup>a</sup>                                         | Methotrexate<br>(N=29)                                    | Mycophenolate Mofetil<br>(N=20)                           |
|-----------------------------------------------------------|-----------------------------------------------------------|-----------------------------------------------------------|
|                                                           | Number of Patients<br>Reporting at Least One<br>Event (%) | Number of Patients<br>Reporting at Least One<br>Event (%) |
| <b>Non-Serious Ocular</b>                                 |                                                           |                                                           |
| Ocular hypertension >24mm Hg                              | 2 (6.9)                                                   | 3 (15.0)                                                  |
| Suspect/confirmed glaucoma diagnosis                      | 1 (3.4)                                                   | 0 (0.0)                                                   |
| Visually significant cataract, surgery indicated          | 4 (13.8)                                                  | 4 (20.0)                                                  |
| Other ocular event                                        | 9 (31.0)                                                  | 5 (25.0)                                                  |
| <b>Serious Ocular</b>                                     |                                                           |                                                           |
| Ocular hypertension, surgery required                     | 1 (3.4)                                                   | 0 (0.0)                                                   |
| Cataract surgery                                          | 1 (3.4)                                                   | 0 (0.0)                                                   |
| <b>Non-Serious Laboratory</b>                             |                                                           |                                                           |
| SGOT or SGPT(2 to 5 times upper limit of normal <28 days) | 1 (3.4)                                                   | 0 (0.0)                                                   |
| Low hemoglobin (>6.5 to <9 g/dL lasting <28 days)         | 0 (0.0)                                                   | 1 (5.0)                                                   |
| <b>Non-Serious Systemic</b>                               |                                                           |                                                           |
| Fatigue                                                   | 13 (44.8)                                                 | 13 (65.0)                                                 |
| Headache                                                  | 12 (41.4)                                                 | 8 (40.0)                                                  |
| Mood changes (self-reported, not requiring therapy)       | 9 (31.0)                                                  | 7 (35.0)                                                  |
| Nausea                                                    | 9 (31.0)                                                  | 8 (40.0)                                                  |
| Muscle weakness, no decrease in function                  | 8 (27.6)                                                  | 2 (10.0)                                                  |
| Numbness or tingling                                      | 5 (17.2)                                                  | 2 (10.0)                                                  |
| Diarrhea                                                  | 6 (20.7)                                                  | 4 (20.0)                                                  |
| Dyspnea                                                   | 8 (27.6)                                                  | 4 (20.0)                                                  |
| Vomiting                                                  | 6 (20.7)                                                  | 6 (30.0)                                                  |
| Allergic reaction                                         | 1 (3.4)                                                   | 1 (5.0)                                                   |
| Fever <103 degrees for 12 hours                           | 4 (13.8)                                                  | 1 (5.0)                                                   |
| Systemic infection                                        | 11 (37.9)                                                 | 6 (30.0)                                                  |
| Other systemic (no treatment required)                    | 18 (62.1)                                                 | 12 (60.0)                                                 |
| <b>Serious Systemic</b>                                   |                                                           |                                                           |
| Diarrhea <sup>b</sup>                                     | 0 (0.0)                                                   | 1 (3.4)                                                   |
| Fatigue <sup>b</sup>                                      | 1 (3.4)                                                   | 0 (0.0)                                                   |

<sup>a</sup>Criteria for defining serious and non-serious adverse events included in eFigure 2

<sup>b</sup>All drug-related serious adverse events were due to diarrhea and fatigue
