# Supplementary material
Source: PubMed Central journal article supplement (PMC6737523)
Supplement: jama-322-936-s004.pdf [file jama-322-936-s004.pdf]

## **Data Sharing Statement**

### **Data available:**

Yes

### **Data types:**

Deidentified participant data  
Data dictionary

### **How to access data:**

Data requests will be reviewed on a case-by-case basis by Dr. Nisha Acharya and the FAST Executive Committee. Interested researchers should send an email request to [nisha.acharya@ucsf.edu](mailto:nisha.acharya@ucsf.edu) along with the research proposal for consideration.

### **When available:**

beginning date: 06-01-2020

### **Document types:**

None

### **Who can access the data:**

Data will be made available to researchers whose proposed use of the data has been approved by Dr. Nisha Acharya and the FAST Executive Committee.

### **Types of analyses:**

Data will be made available to researchers with a clear and defined research plan, and whose proposal has been approved by Dr. Nisha Acharya and the FAST Executive Committee.

### **Mechanisms of data availability:**

Data will be made available after approval of a proposal.

### **Any additional restrictions:**

Data provided will be de-identified.
